# Supplementary material for: Effectiveness of organic solvents for recovering collapsed PDMS micropillar arrays
Source: Royal Society of Chemistry journal article supplement (doi:10.1039/d2ra08109a), 2023-01-01
Supplement: d2ra08109a1.pdf [file d2ra08109a1.pdf]

## Supporting Information

### Effectiveness of organic solvents for recovering collapsed PDMS micropillar arrays

Dong Wang<sup>a,b,c</sup>, Zhuang Ma<sup>a,b,c,d</sup>, Xinchun Tian<sup>a,b,\*</sup>

<sup>a</sup> School of Materials Science and Engineering, Beijing Institute of Technology, Beijing, 100081, China

<sup>b</sup> National Key Laboratory of Science and Technology on Material under Shock and Impact, Beijing 100081, China

<sup>c</sup> Tangshan Research Institute, Beijing Institute of Technology, Tangshan 063000, China

<sup>d</sup> Beijing Institute of Technology Chongqing Innovation Center, Chongqing, 401120, China

**Table S1.** Values of surface tension and swelling ratio of various solvents<sup>1-3</sup>

| Solvents           | Surface tension (mN/m) | PDMS Swelling Ratio |
|--------------------|------------------------|---------------------|
| perfluorodecalin   | 15.4                   | 1.00                |
| dimethyl sulfoxide | 43.7                   | 1.00                |
| ethanol            | 22.3                   | 1.04                |
| isopropanol        | 22.6                   | 1.09                |
| butyl acetate      | 25.8                   | 1.22                |
| benzene            | 28.9                   | 1.28                |
| cyclohexane        | 25.9                   | 1.33                |
| heptane            | 21.6                   | 1.34                |
| hexanes            | 20.3                   | 1.35                |
| pentane            | 18.7                   | 1.44                |

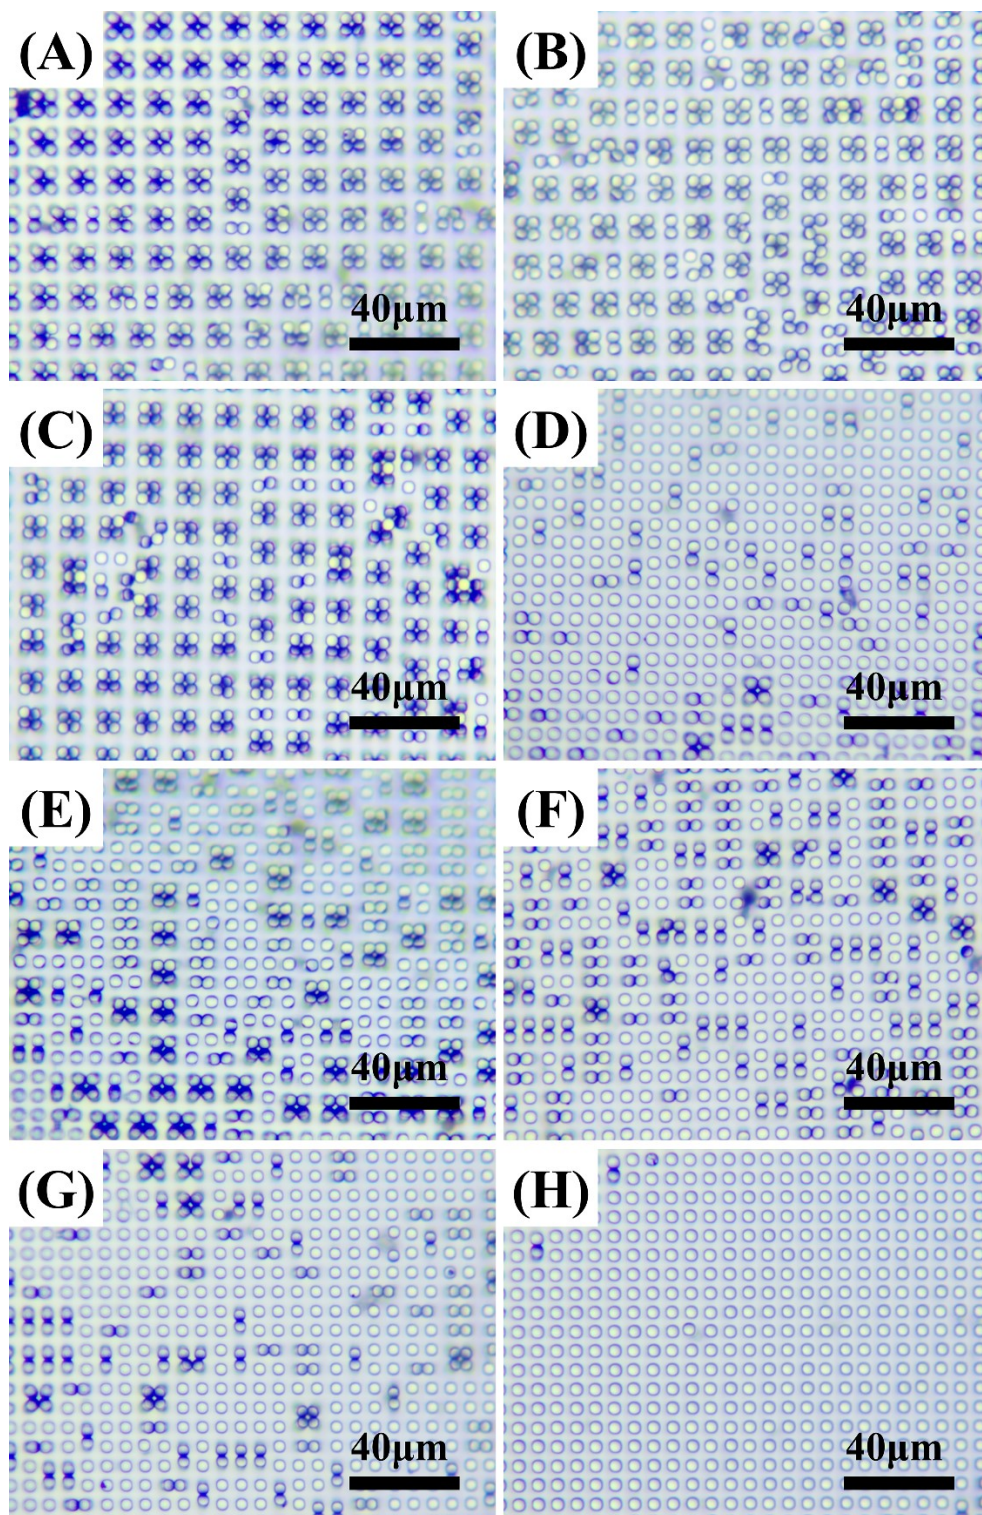

**Figure S1.** Optical images of PDMS micropillar arrays after washing and drying with different solvents. (A) perfluorodecalin, (B) dimethyl sulfoxide, (C) isopropanol, (D) butyl acetate, (E) benzene, (F) cyclohexane, (G) heptane, (H) pentane.



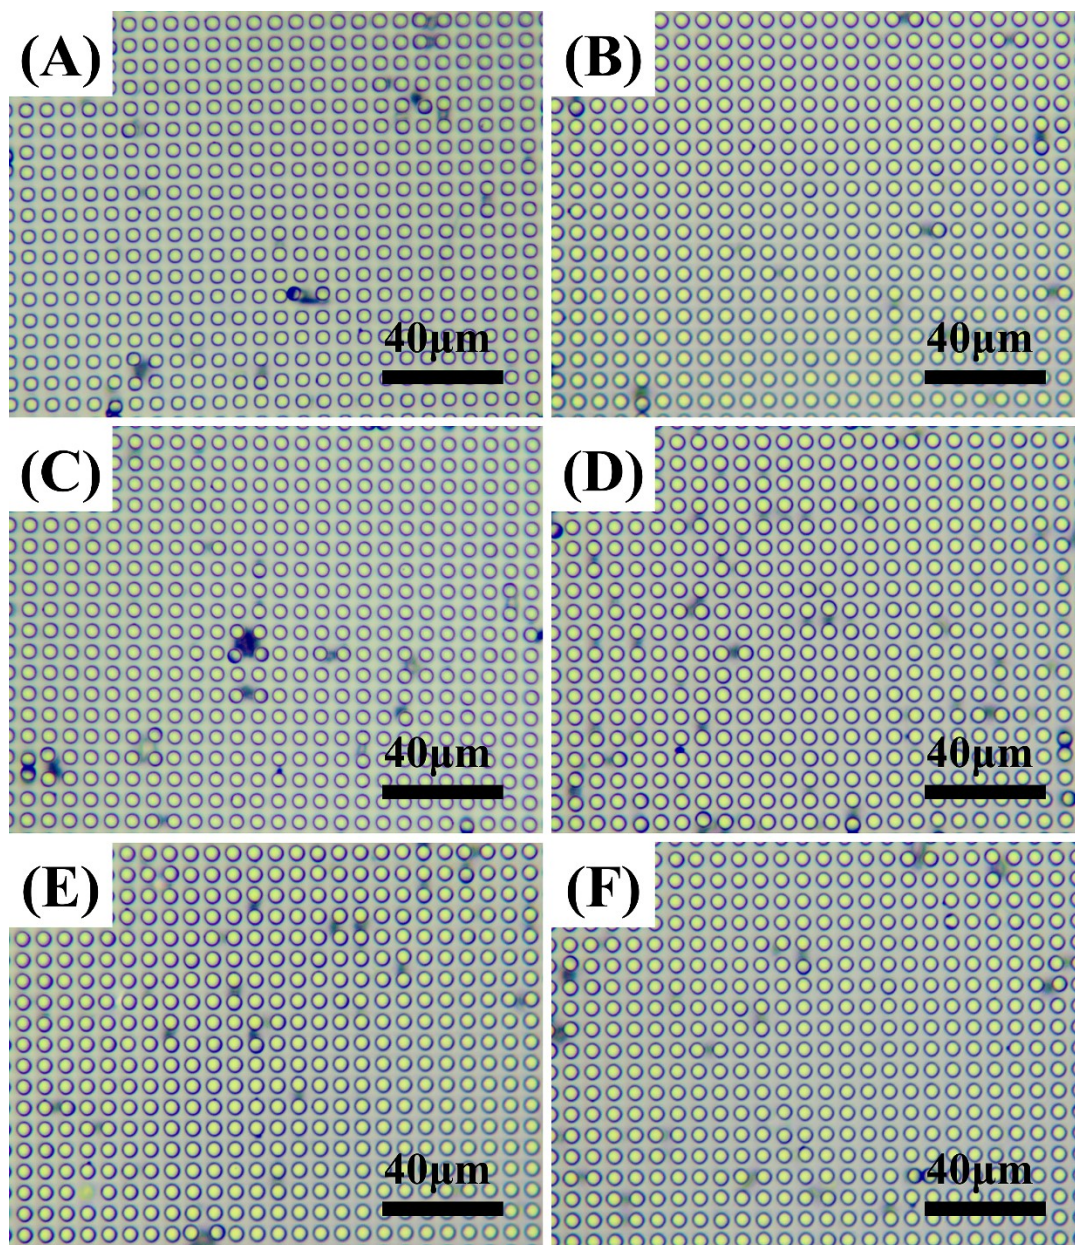

**Figure S2.** Optical images of PDMS micropillar arrays after washed and dried in hexanes. Before using hexanes, the micropillars were first washed and dried in (A) perfluorodecalin, (B) dimethyl sulfoxide, (C) isopropanol, (D) butyl acetate, (E) benzene, or (F) cyclohexane to induce possible micropillar collapsing. Notice that the grey/dark spots in the micrographs are contaminants due to exposure to air in lab for more than a month.

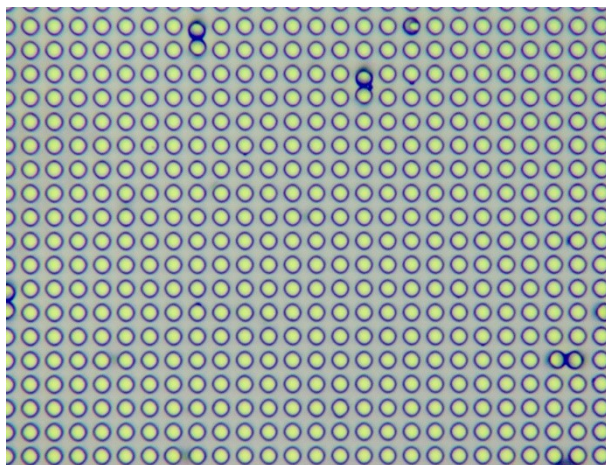

**Figure S3.** Optical images of PDMS micropillar arrays after washing and drying at 100°C with heptane.

## References

- 1 ChemSpider, Royal Society of Chemistry 2023, <http://www.chemspider.com/>.
- 2 Y. Wang, J. Balowski, C. Phillips, R. Phillips, C. E. Sims and N. L. Allbritton, *Lab Chip*, 2011, **11**, 3089-3097.
- 3 J. N. Lee, C. Park and G. M. Whitesides, *Anal. Chem.*, 2003, **75**, 6544-6554.
